# Supplementary material for: HIF activation enhances FcγRIIb expression on mononuclear phagocytes impeding tumor targeting antibody immunotherapy
Source: PubMed Central journal article supplement (PMC8988350; doi:10.1186/s13046-022-02294-5), 2022-04-07

### Additional file 1: Table S1.

| Targeted region                                     | Forward sequence               | Reverse sequence            |
|-----------------------------------------------------|--------------------------------|-----------------------------|
| <i>FCGR2B</i> promoter; AP-1 binding site           | 5'-ATGCTCAATTTCAAGAAGCATCCA-3' | 5'-TGAGAAAGGGTGATGCAGGA-3'  |
| <i>FCGR2B</i> promoter; HIF-2 $\alpha$ binding site | 5'-AGGGAAGGTCCTCACAGAAT-3'     | 5'-AGGTTTCGGGTTGAATGCCAG-3' |

**Fig. S1.**

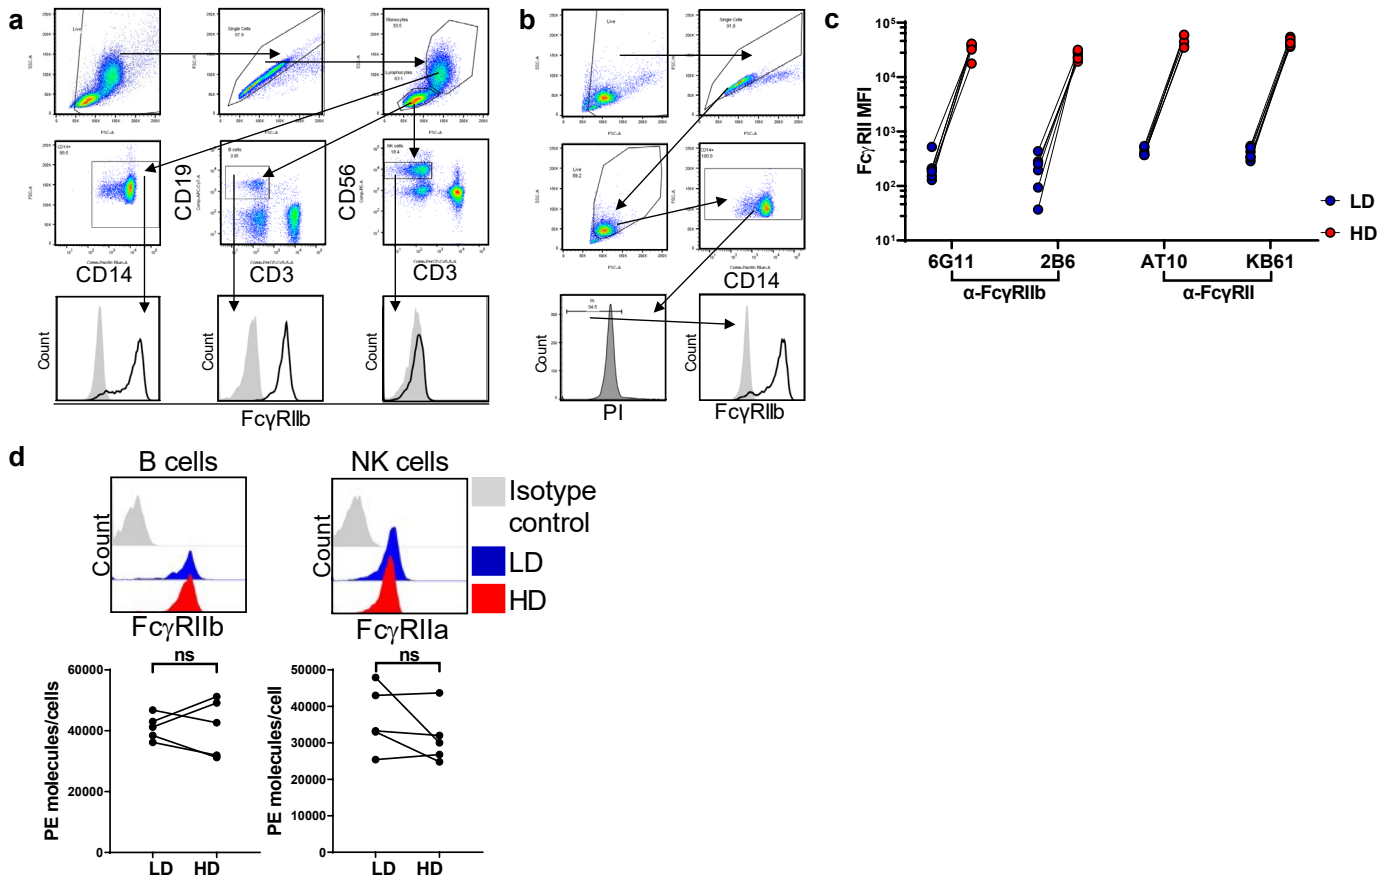

Additional file 2: Fig. S2.

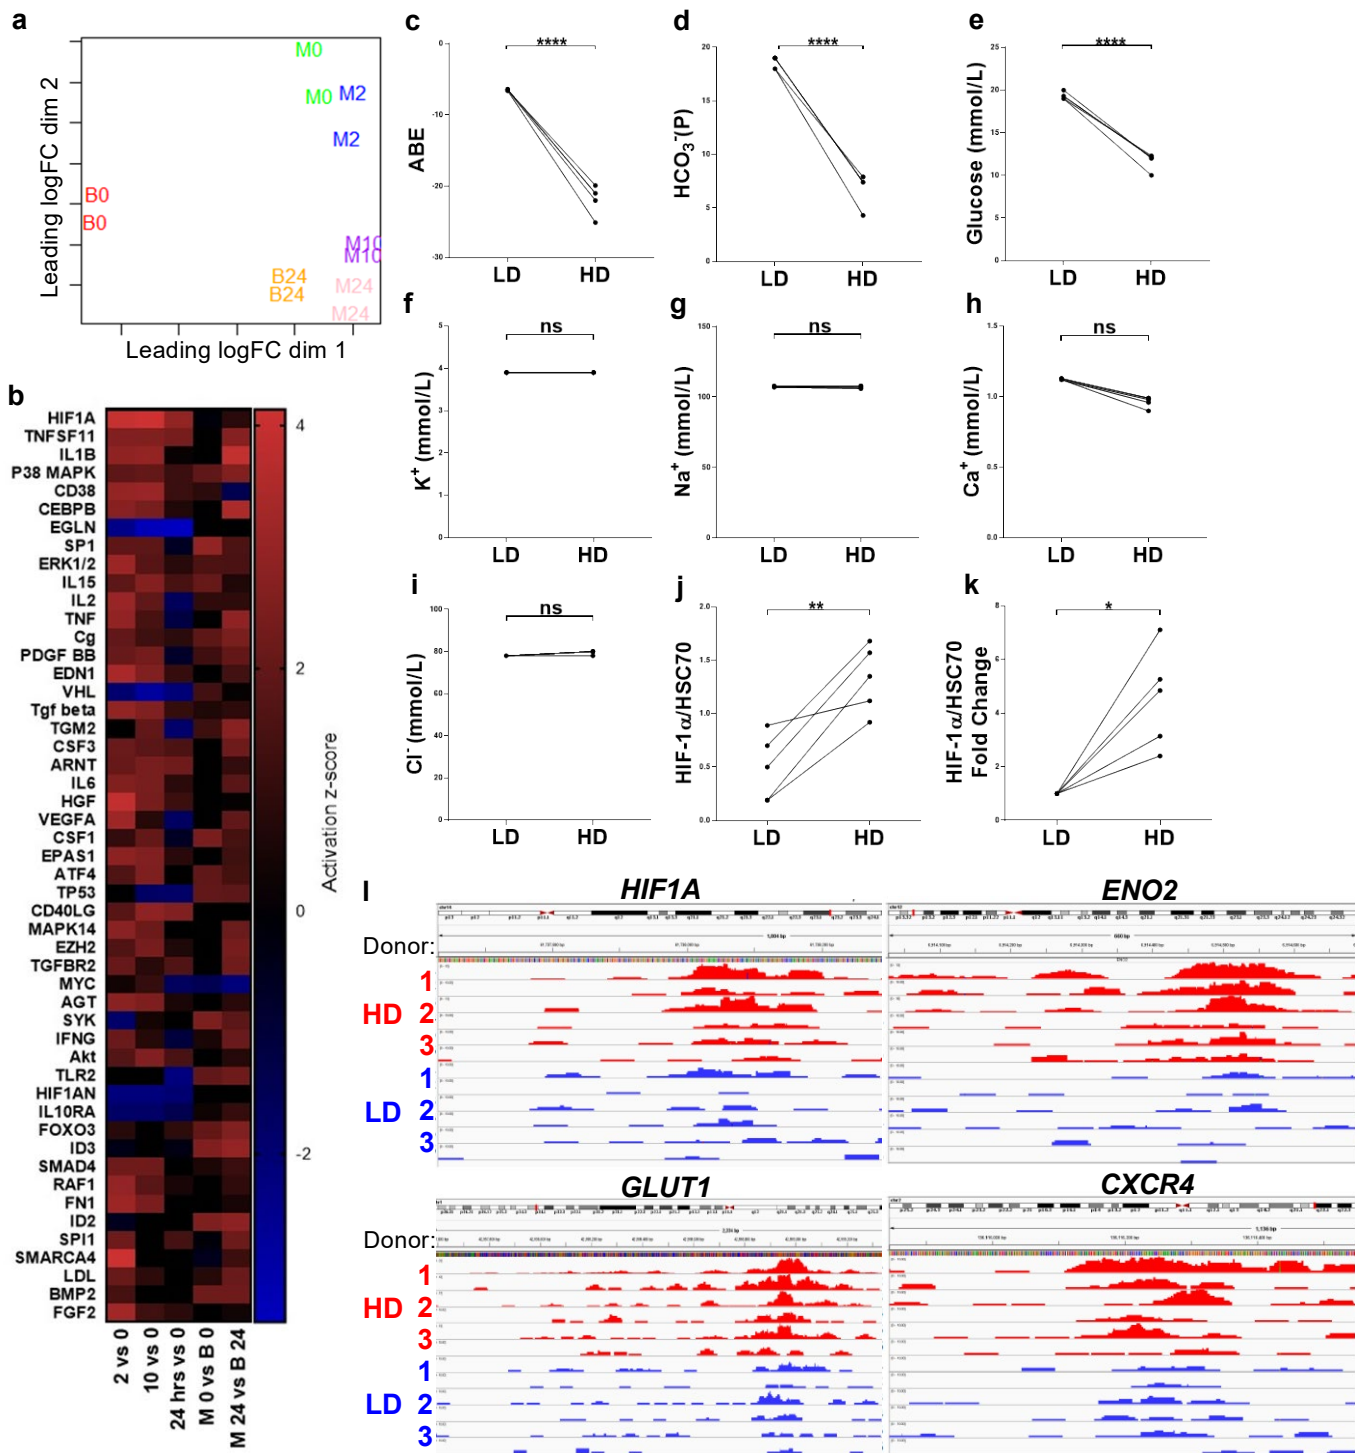

Additional file 3: Fig. S3.

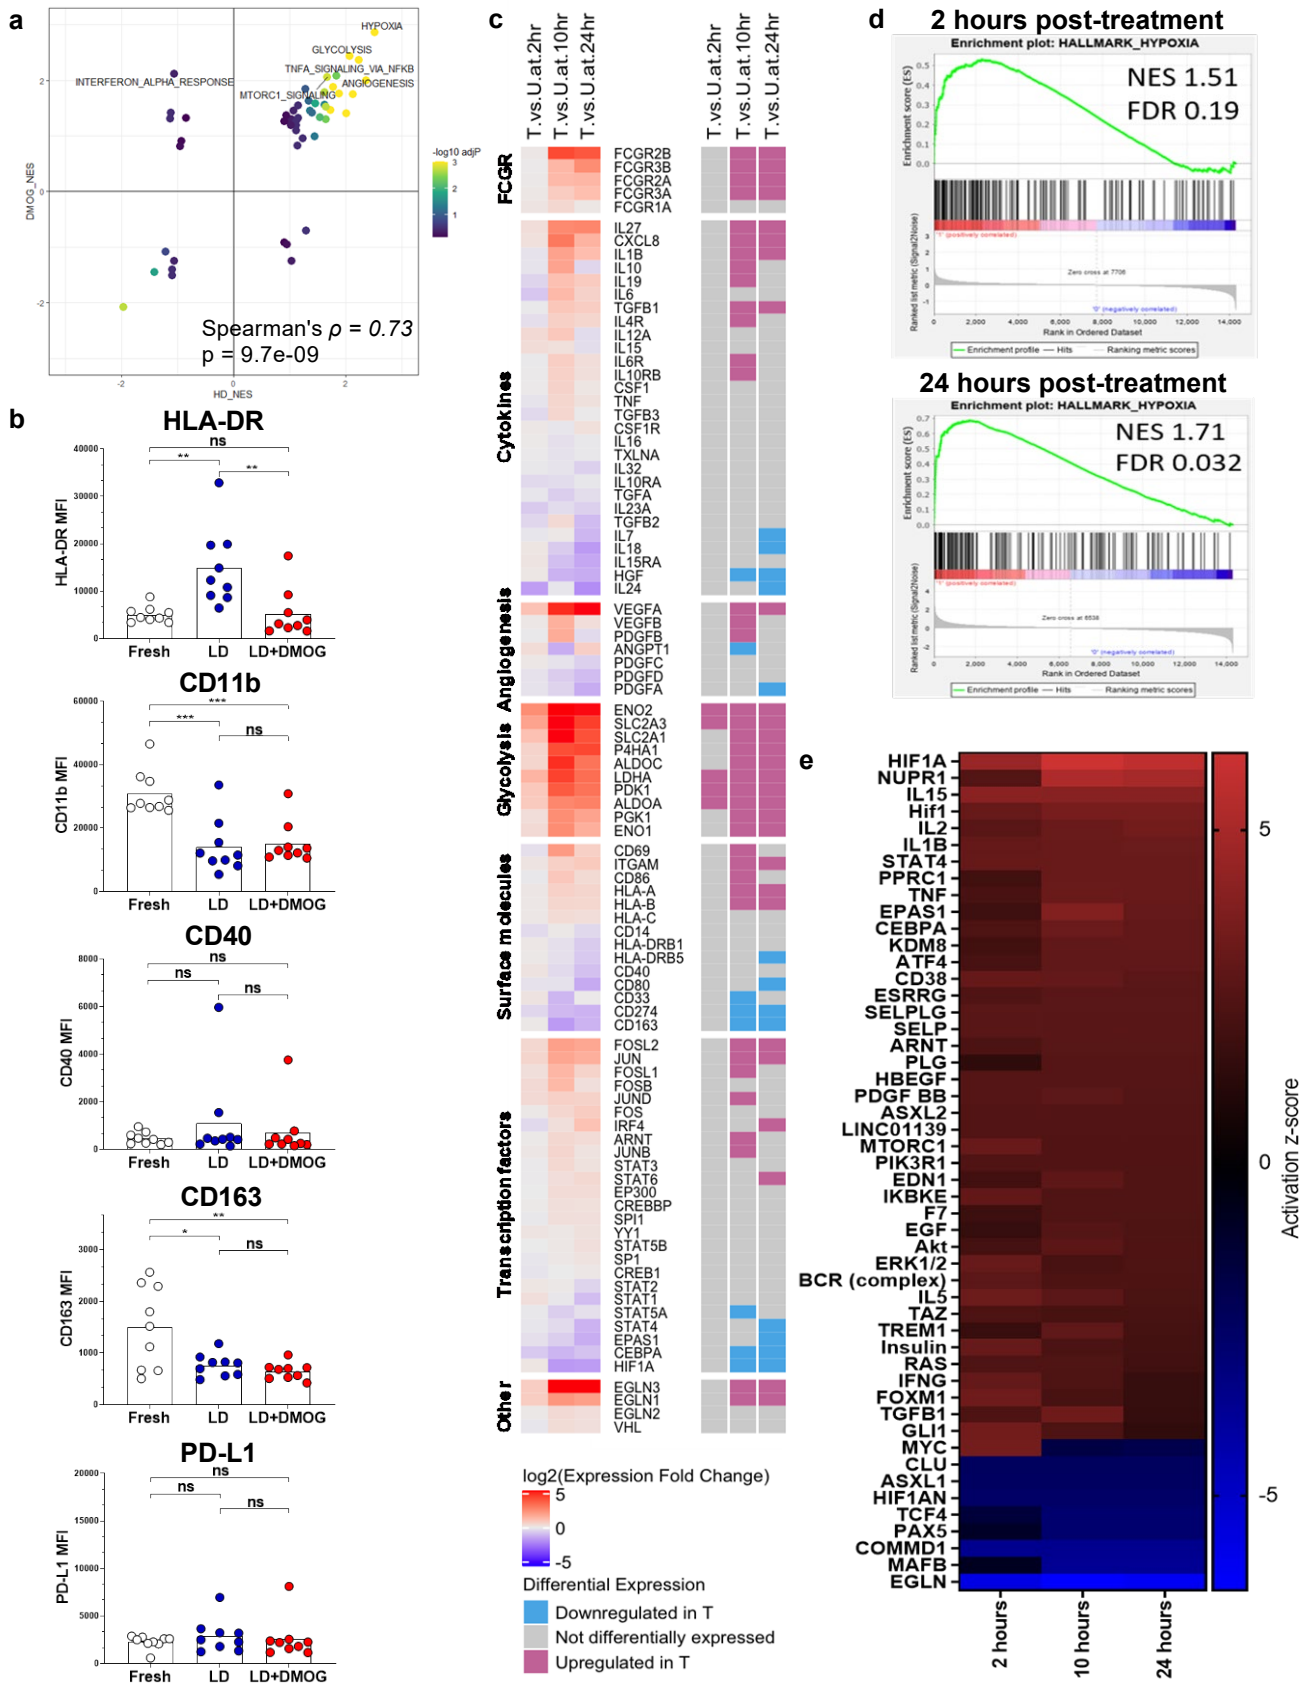

**Additional file 4: Fig. S4.**

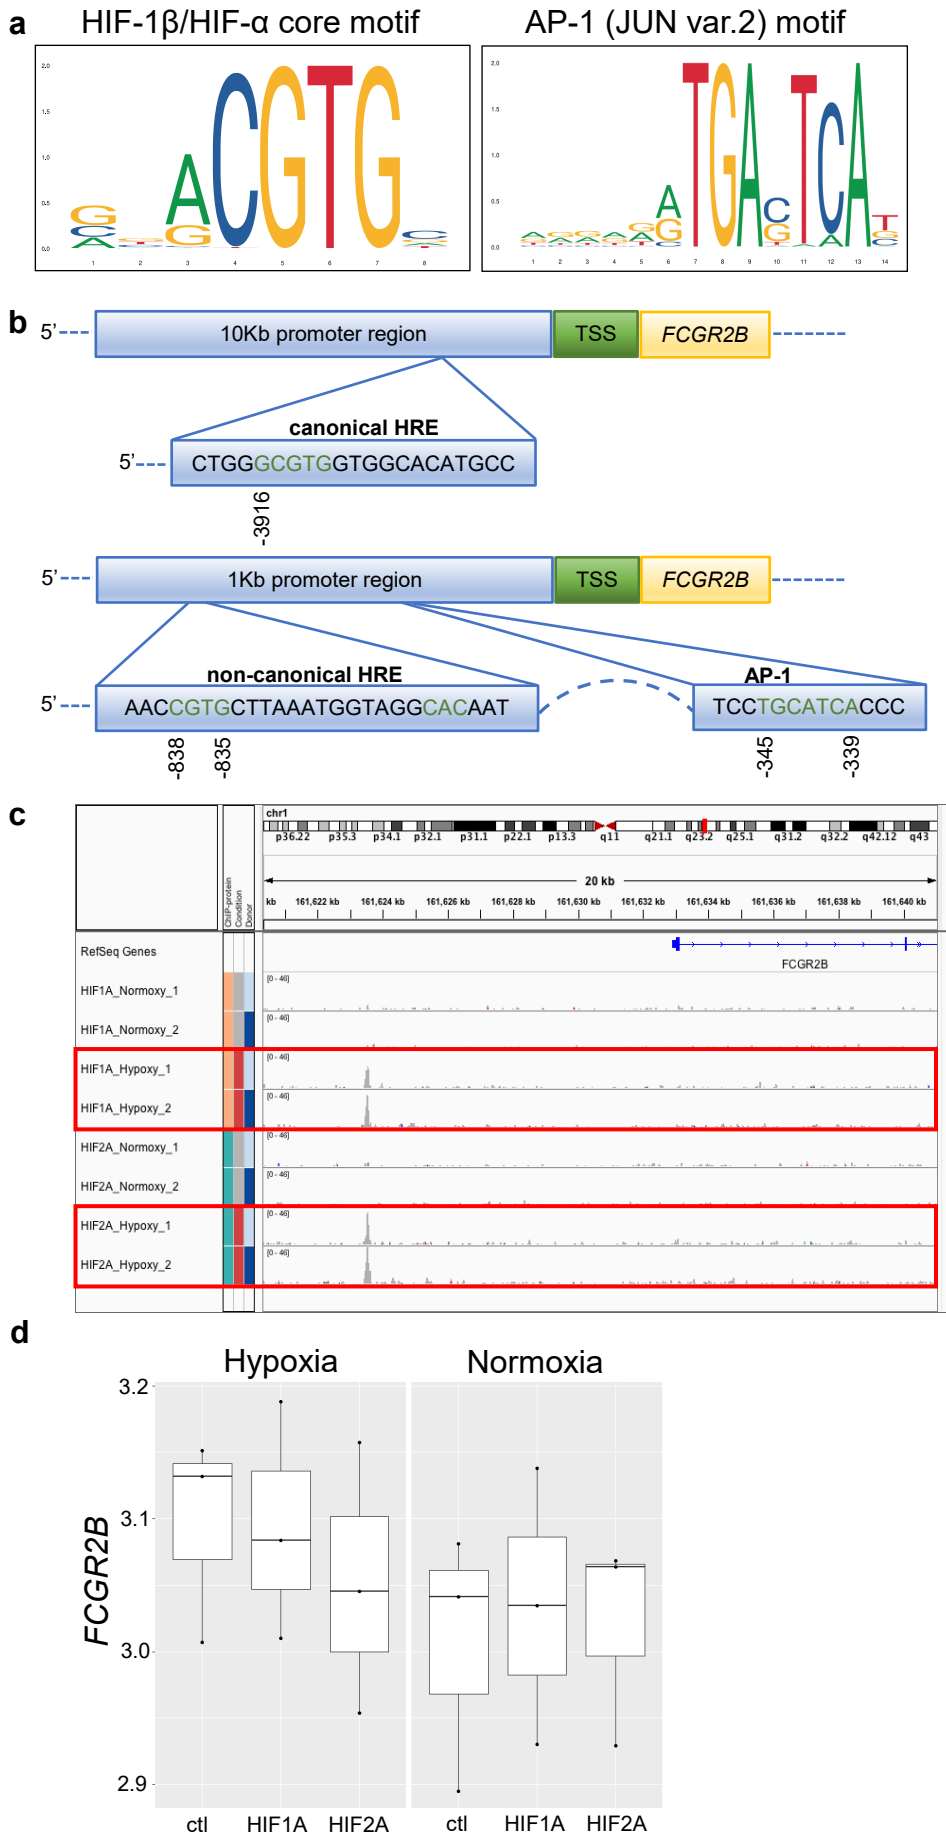

Additional file 5: Fig. S5.

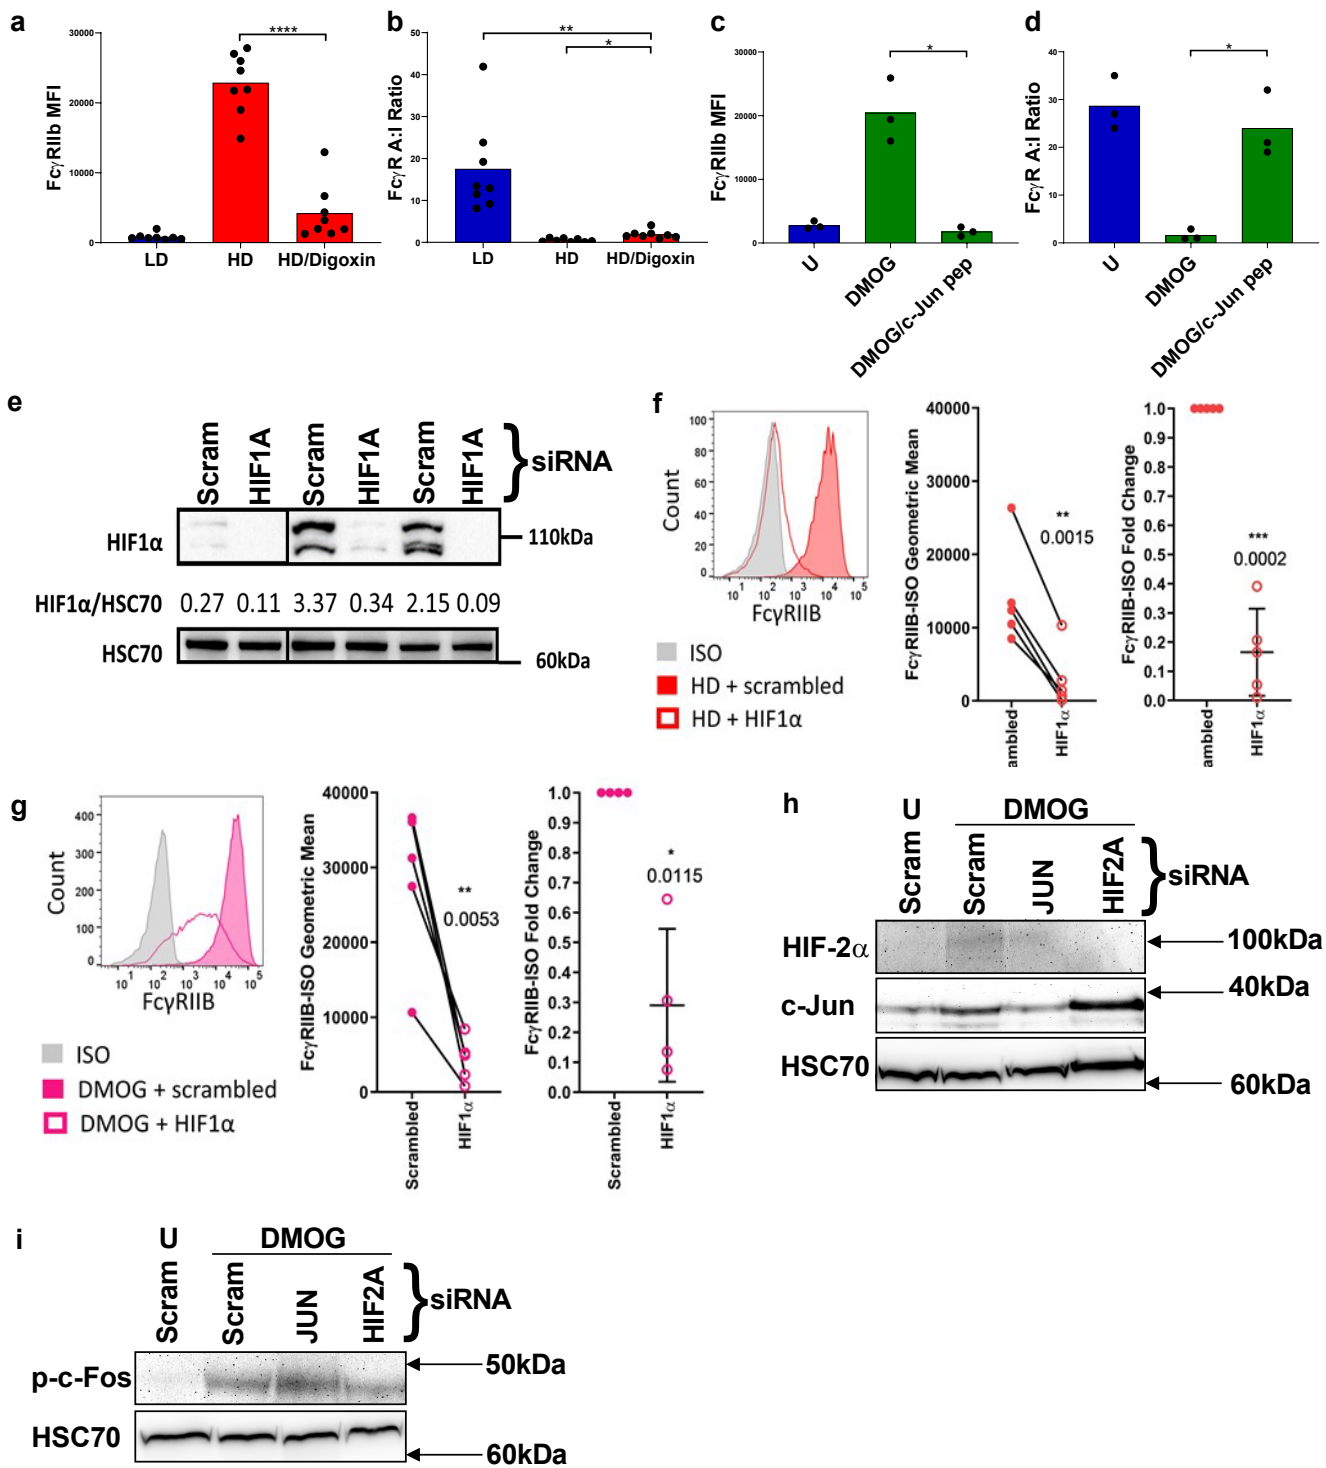

Additional file 6: Fig. S6.

MC38 tumor

E0771 tumor

a

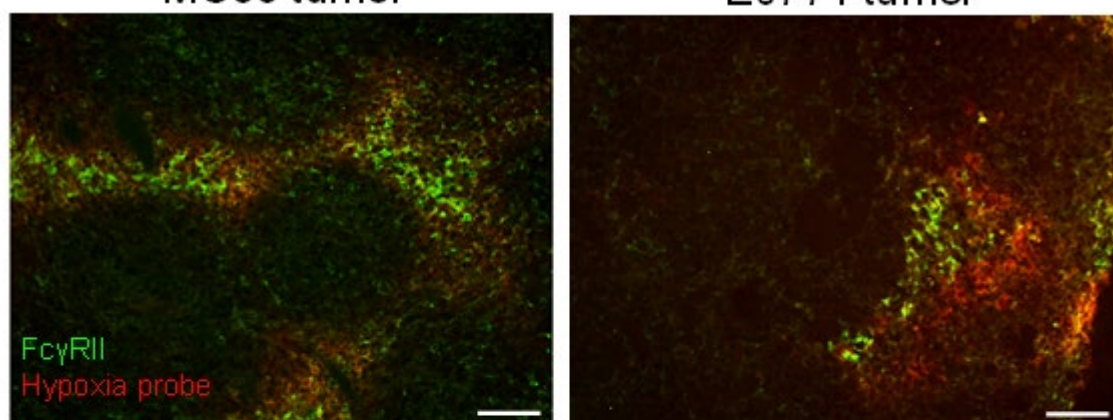

b

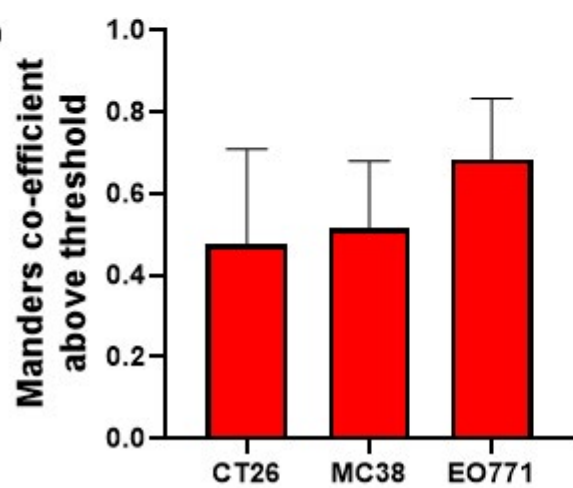

**Additional file 7: Fig. S7.**

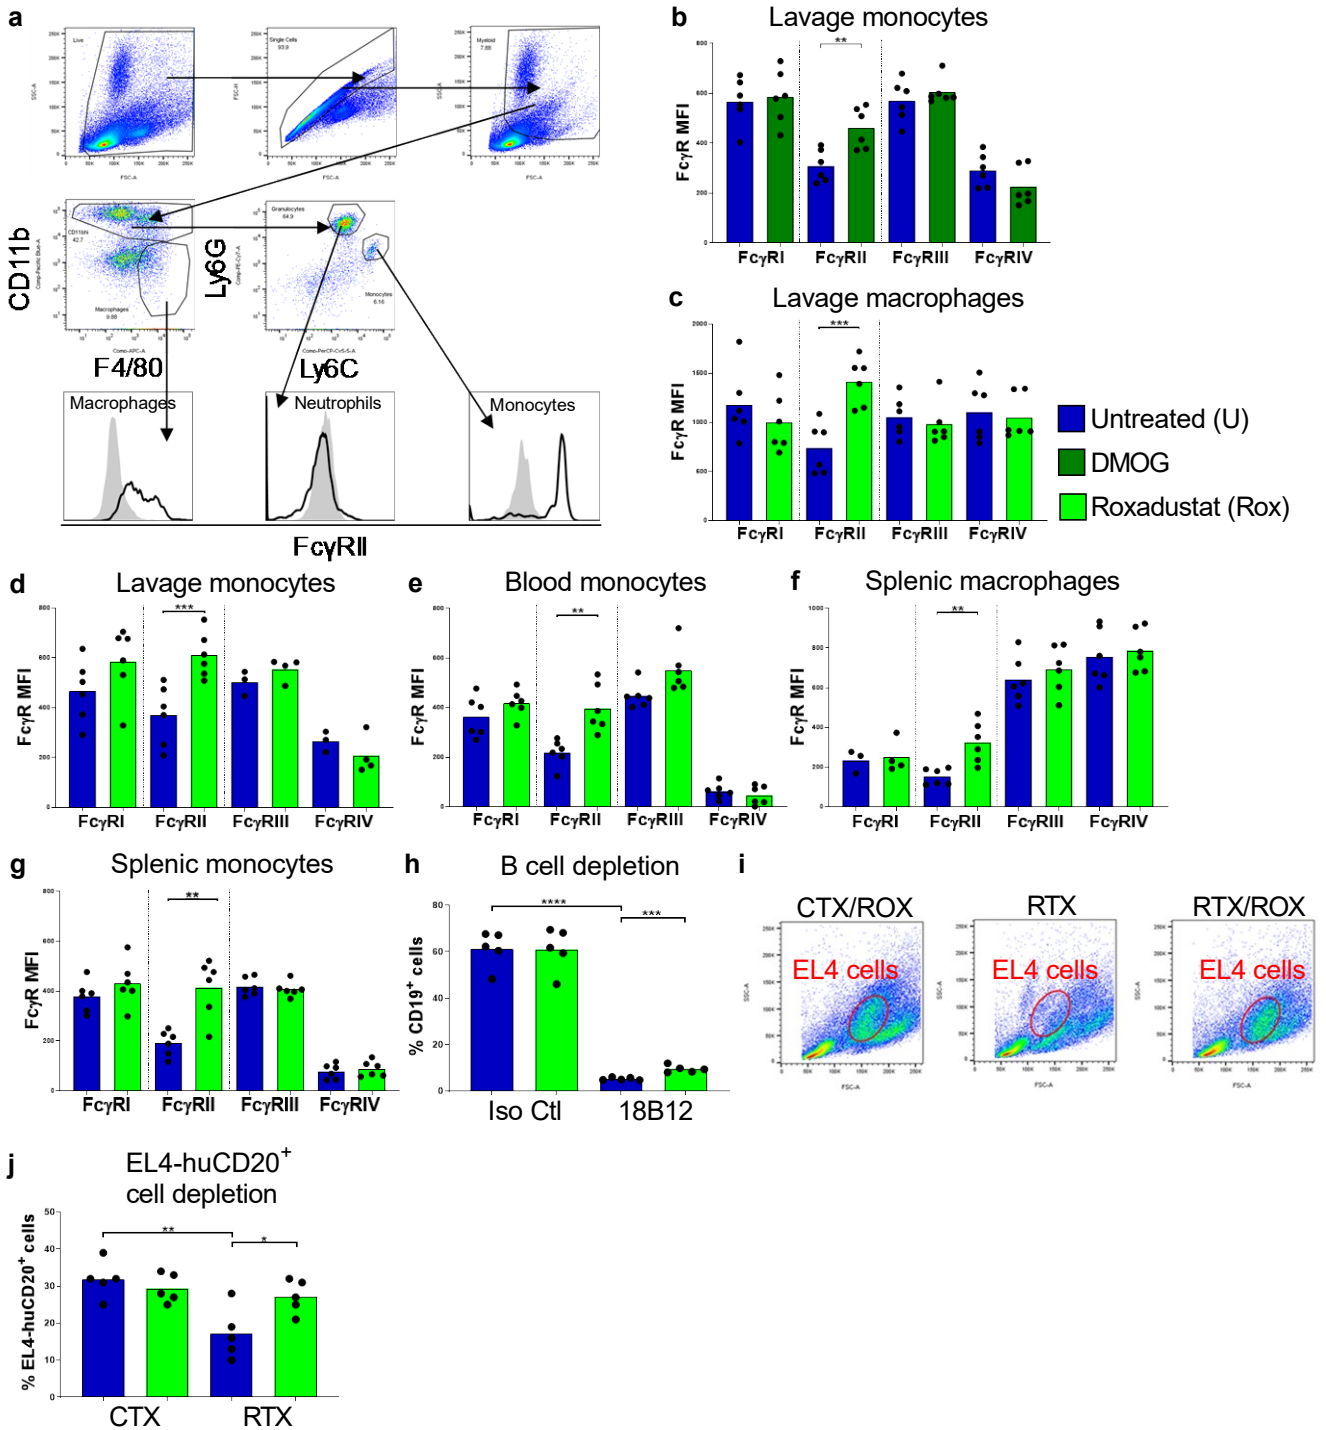

Supplement: 13046_2022_2294_MOESM1_ESM.pdf [file 13046_2022_2294_MOESM1_ESM.pdf]
